# Supplementary material for: Cyanoacrylic- and (1-cyanovinyl)phosphonic acid anchoring ligands for application in copper-based dye-sensitized solar cells
Source: Royal Society of Chemistry journal article supplement (doi:10.1039/c6ra20375b), 2016-01-01
Supplement: c6ra20375b1.pdf [file c6ra20375b1.pdf]

**ESI to accompany:**

**Cyanoacrylic- and (1-cyanovinyl)phosphonic acid anchoring ligands for application in copper-based dye-sensitized solar cells**

Yann Baumgartner,<sup>a</sup> Y. Maximilian Klein,<sup>a</sup> Edwin C. Constable,<sup>a</sup> Catherine E. Housecroft<sup>\*a</sup> and Markus Willgert<sup>a</sup>

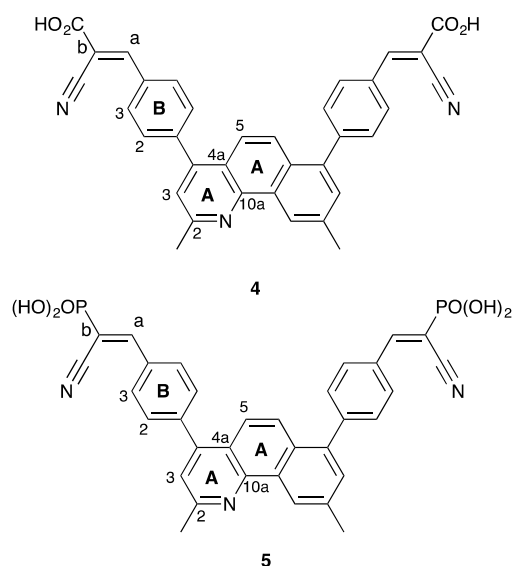

**Scheme S1.** Atom numbering for NMR spectroscopic assignments for ligands **4** and **5**.

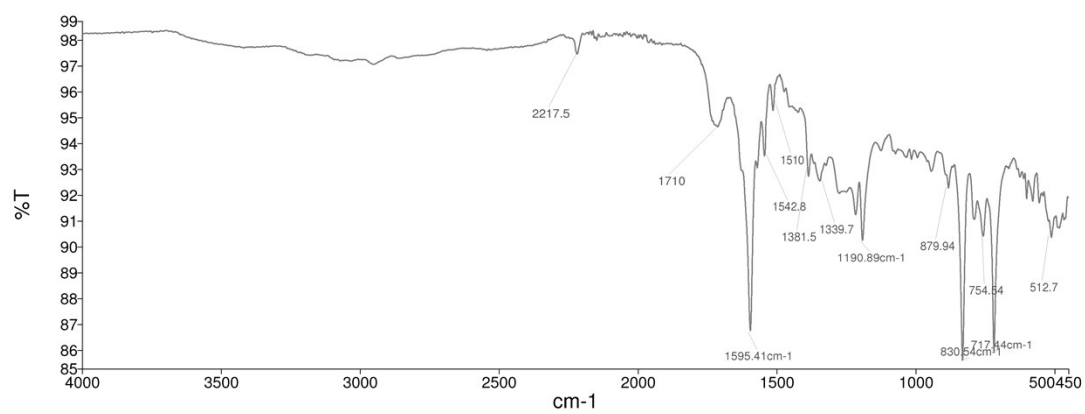

(a)

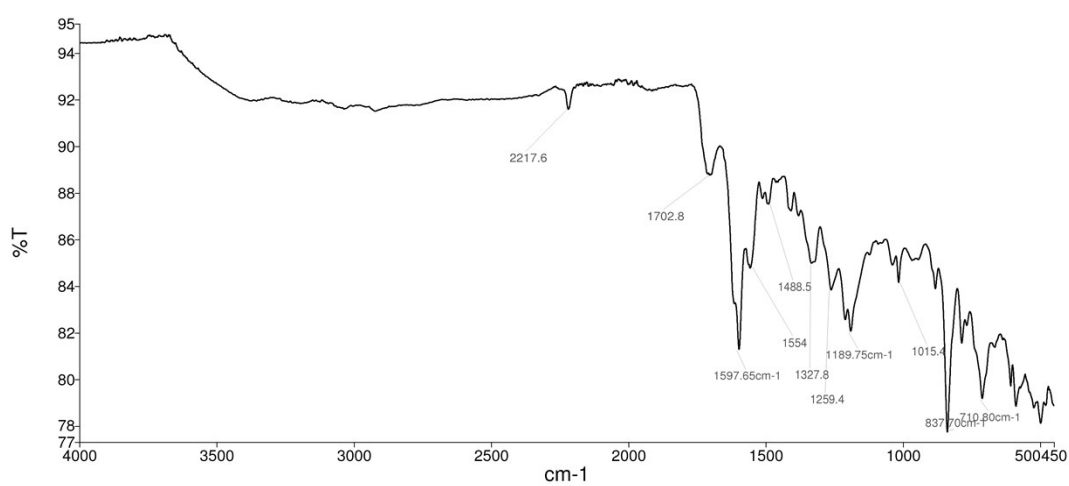

(b)

**Fig. S1.** Solid state IR spectra of (a) **2** and (b) **4**.

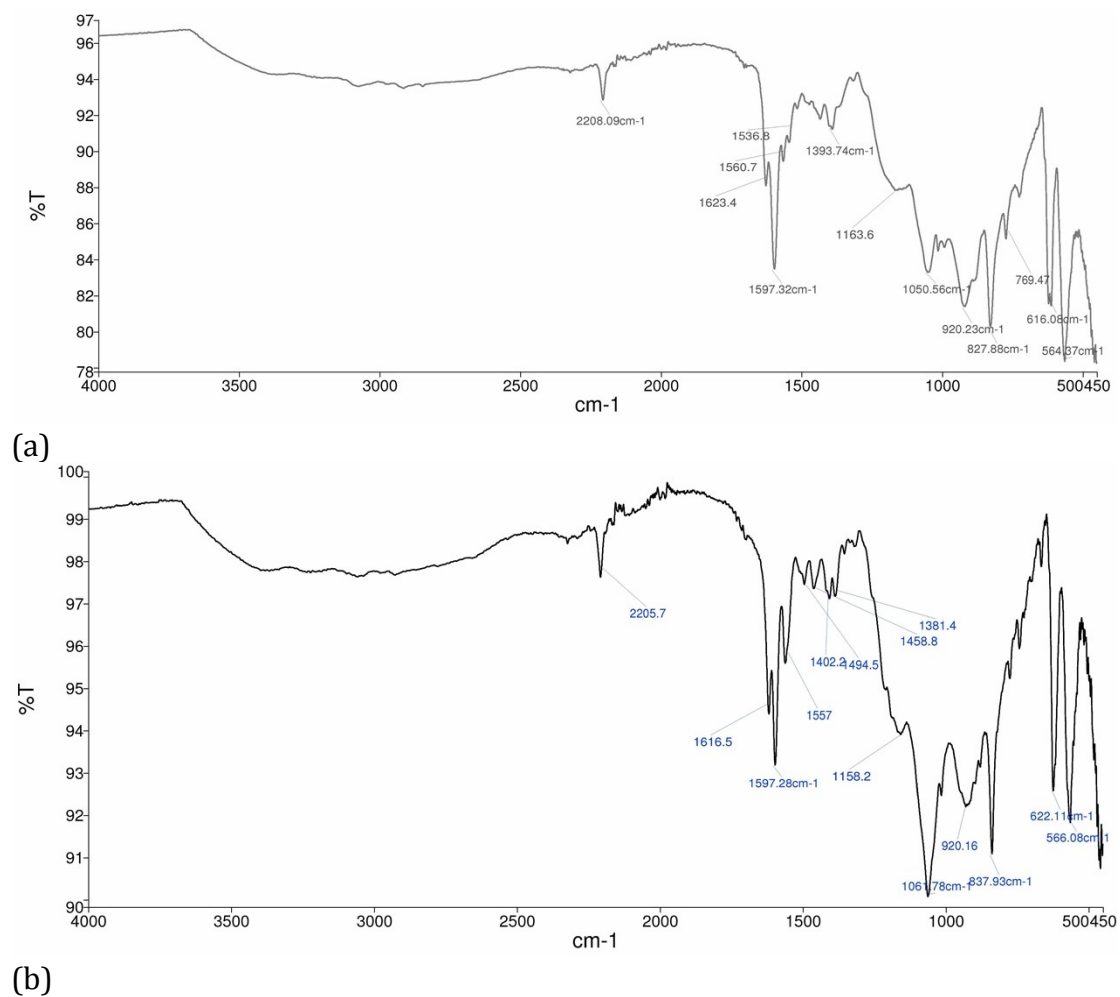

**Fig. S2.** Solid state IR spectra of (a) **3** and (b) **5**.

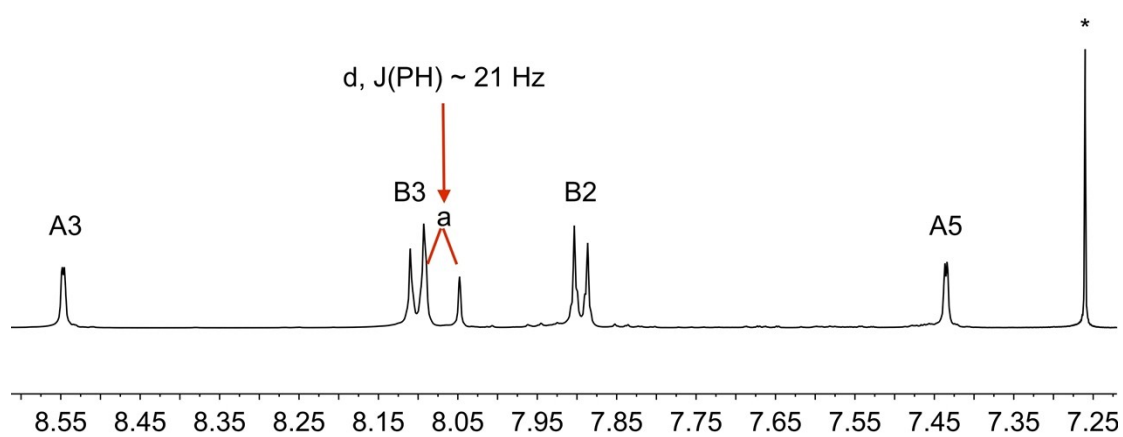

**Fig. S3.** The non-alkyl region of the 500 MHz  $^1\text{H}$  NMR spectrum of a  $\text{CDCl}_3$  solution of **3a**. \* = residual  $\text{CDH}_2\text{Cl}$ .

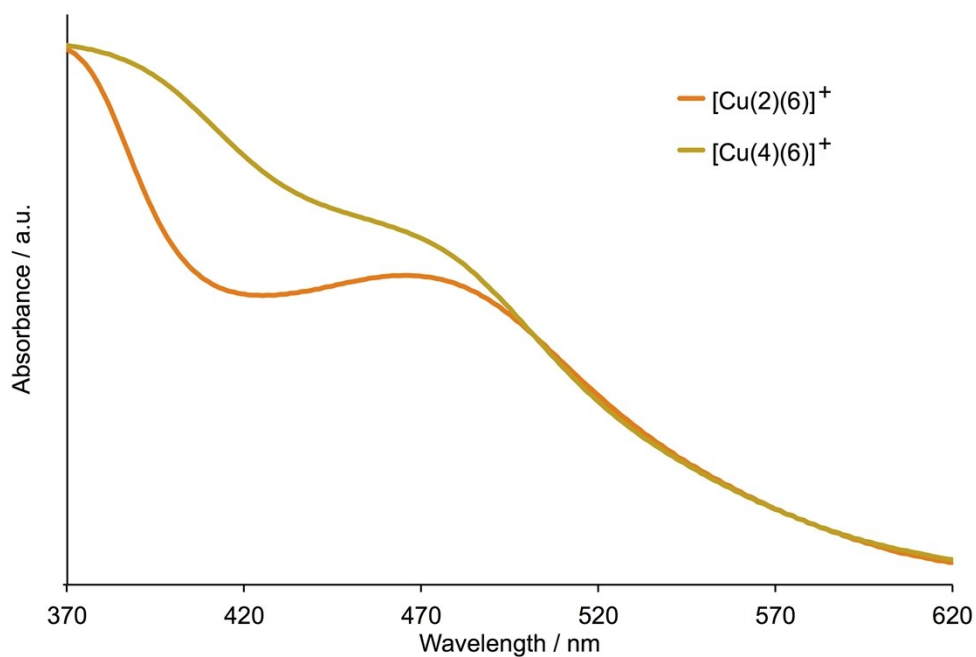

**Fig. S4.** Solid-state absorption spectra of transparent FTO/TiO<sub>2</sub> electrodes functionalized with [Cu(**2**)(**6**)]<sup>+</sup> and [Cu(**4**)(**6**)]<sup>+</sup>. Both **2** and **4** contains a CO<sub>2</sub>H anchor; **2** contains a bpy-metal binding unit and **4**, a phen-unit.

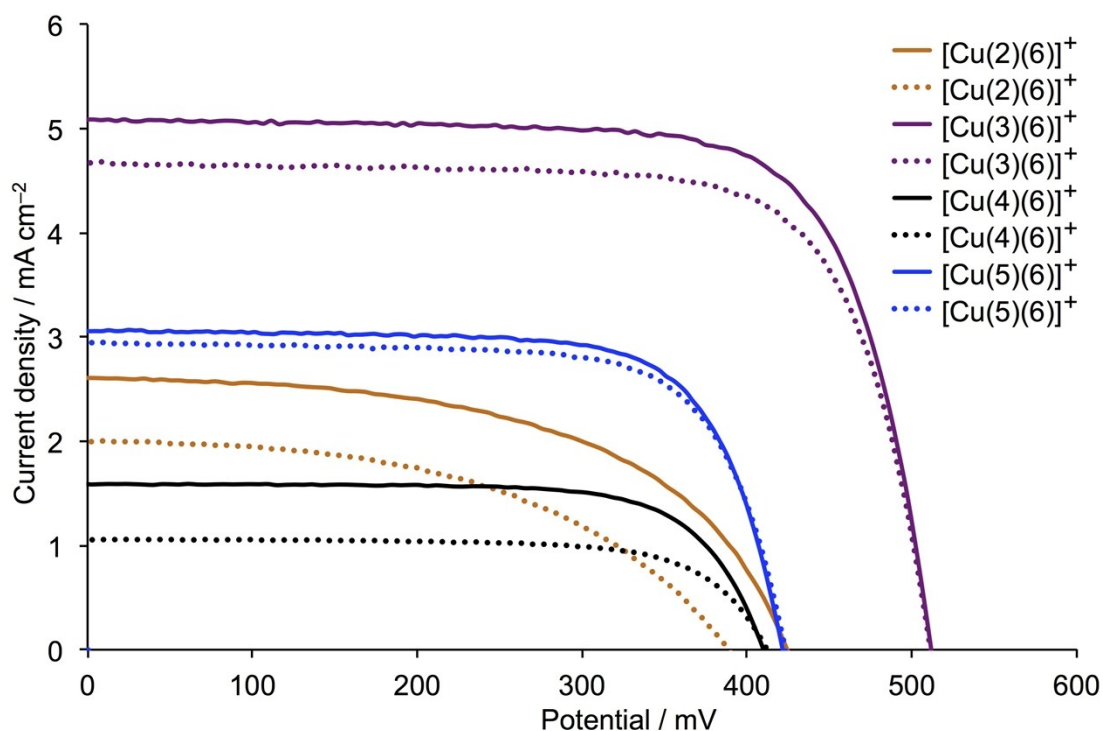

**Fig. S5.** *J*-*V* curves for duplicate pairs of DSCs containing [Cu(**2**)(**6**)]<sup>+</sup>, [Cu(**3**)(**6**)]<sup>+</sup>, [Cu(**4**)(**6**)]<sup>+</sup> and [Cu(**5**)(**6**)]<sup>+</sup> combined with I<sub>3</sub><sup>-</sup>/I<sup>-</sup> electrolyte.

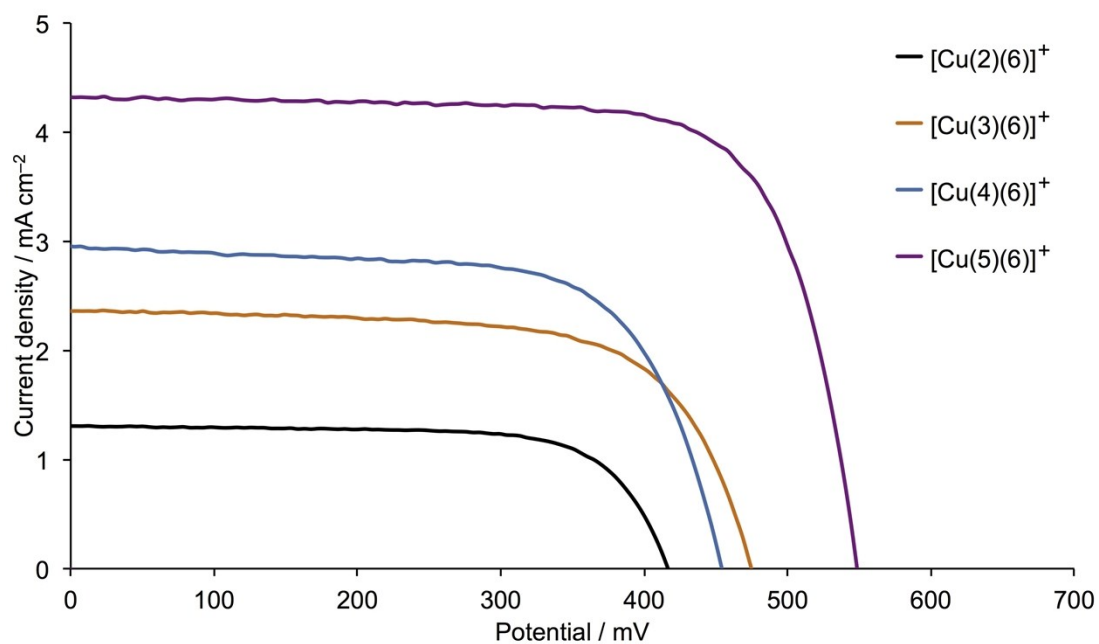

**Fig. S6.**  $J$ - $V$  curves for duplicate pairs of DSCs 7 days after sealing cells containing  $[\text{Cu}(2)(6)]^+$ ,  $[\text{Cu}(3)(6)]^+$ ,  $[\text{Cu}(4)(6)]^+$  and  $[\text{Cu}(5)(6)]^+$  combined with  $\text{I}_3^-/\text{I}^-$  electrolyte.

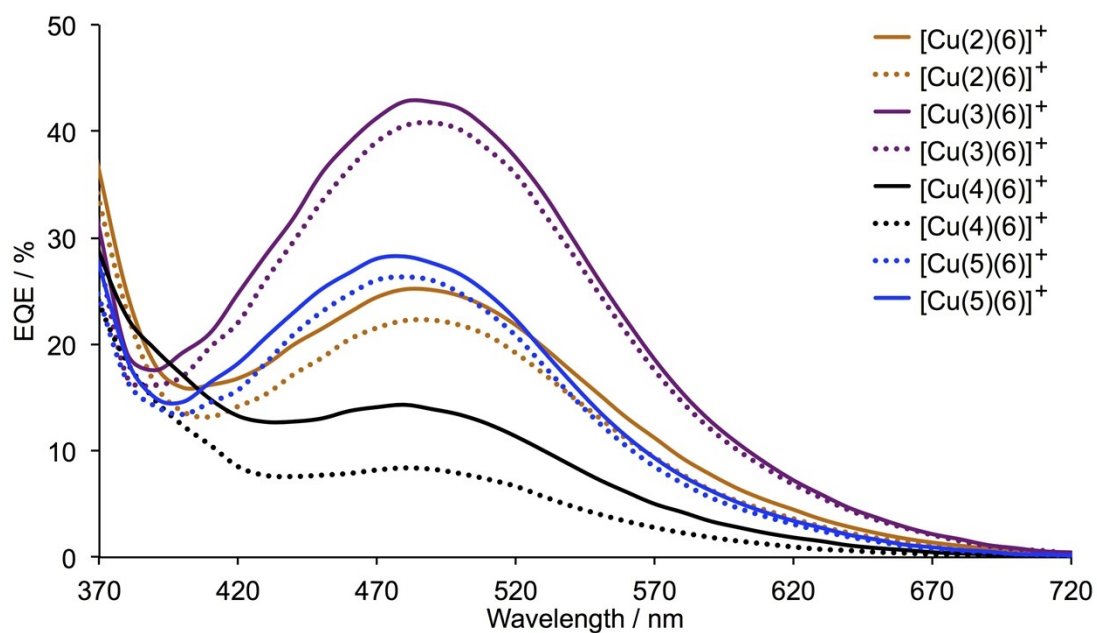

**Fig. S7.** EQE spectra for duplicate pairs of DSCs containing  $[\text{Cu}(2)(6)]^+$ ,  $[\text{Cu}(3)(6)]^+$ ,  $[\text{Cu}(4)(6)]^+$  and  $[\text{Cu}(5)(6)]^+$  combined with  $\text{I}_3^-/\text{I}^-$  electrolyte.

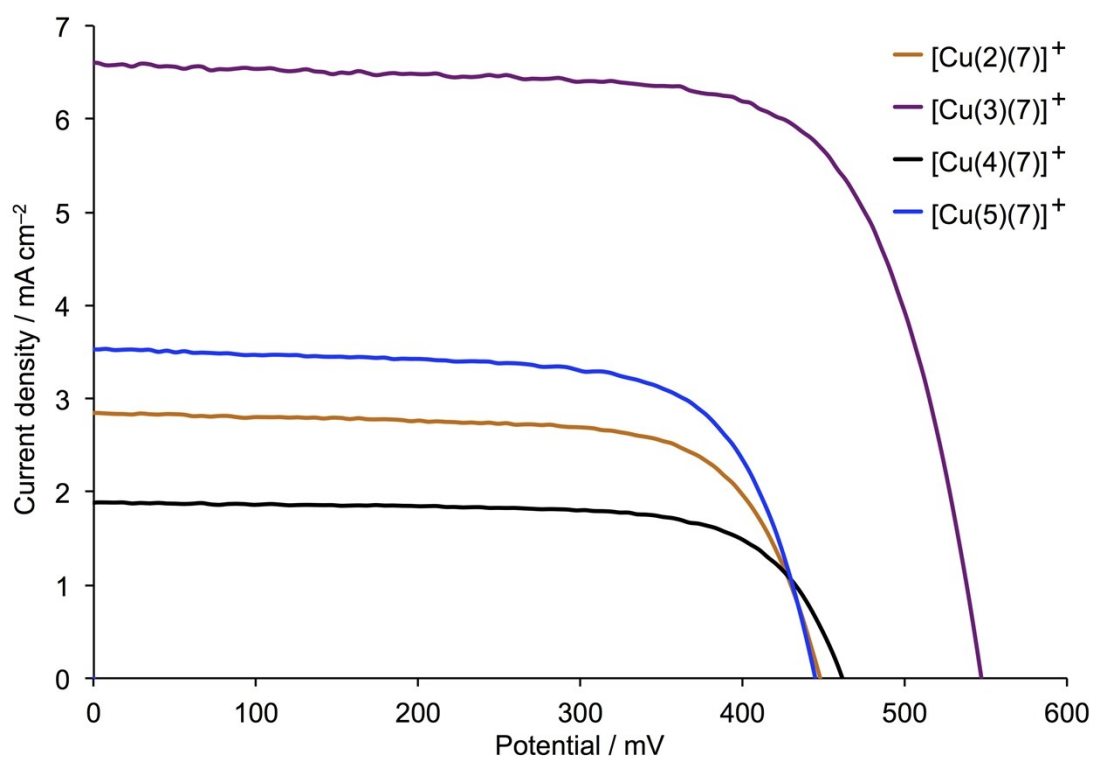

**Fig. S8.**  $J$ - $V$  curves for DSCs containing  $[\text{Cu}(2)(7)]^+$ ,  $[\text{Cu}(3)(7)]^+$ ,  $[\text{Cu}(4)(7)]^+$  and  $[\text{Cu}(5)(7)]^+$  combined with  $\text{I}_3^-/\text{I}^-$  electrolyte.

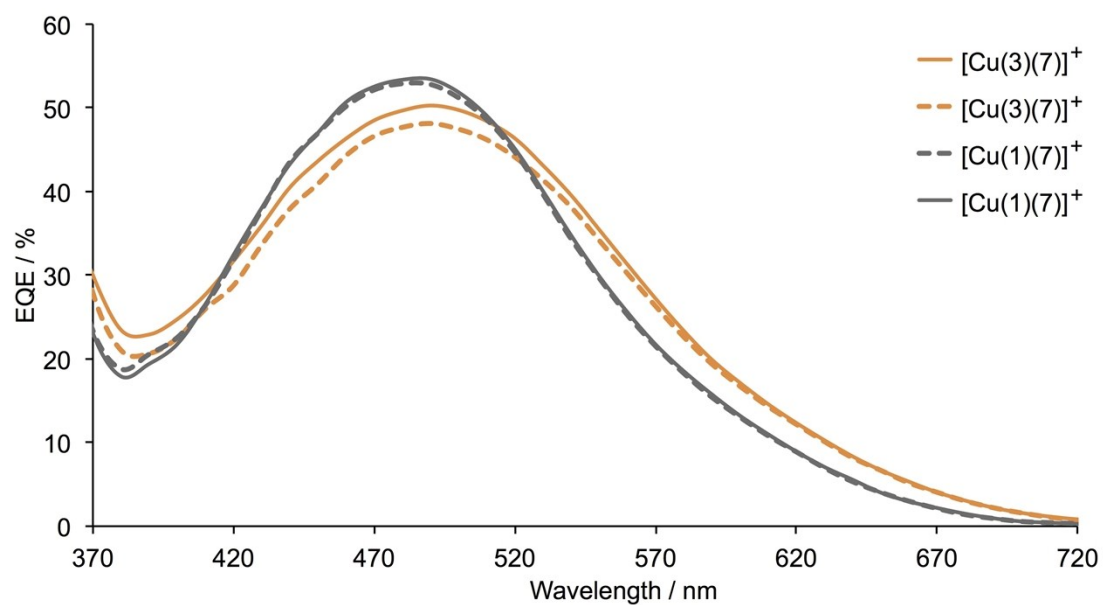

**Fig. S9.** EQE spectra for duplicate DSCs containing dyes  $[\text{Cu}(3)(7)]^+$  and  $[\text{Cu}(1)(7)]^+$ .

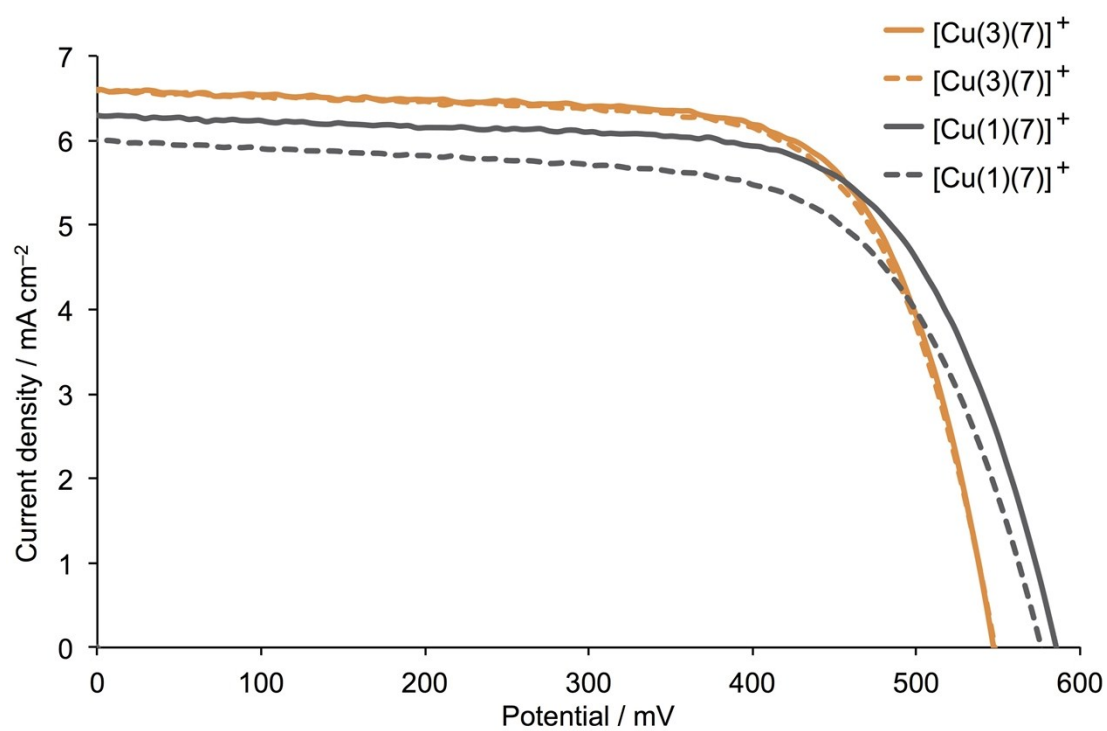

**Fig. S10.**  $J$ - $V$  curves for duplicate, masked DSCs containing dyes  $[\text{Cu}(3)(7)]^+$  and  $[\text{Cu}(1)(7)]^+$  with  $\text{I}_3^-/\text{I}^-$  electrolyte.
